# Supplementary material for: Association between blood eosinophil count and risk of readmission for patients with asthma: Historical cohort study
Source: PLoS One. 2018 Jul 25;13(7):e0201143. doi: 10.1371/journal.pone.0201143 (PMC6059485; doi:10.1371/journal.pone.0201143)
Supplement: S3 Table — (DOCX) [file pone.0201143.s004.docx]

**S3 Table. Readmissions for Asthma within 1 Year and Hazard Ratios for Readmission in the High Eosinophil Count Cohort: Sensitivity Analyses.**

| **Readmission** | **Adjusted HR**  **(95% CI)** | **P value** |
| --- | --- | --- |
| Applying different definitions of high blood eosinophil count (n=2,613) |  |  |
| High eosinophil count defined as ≥0.25x109 cells/L | 1.17 (0.82−1.66)a | 0.39 |
| By known smoking status: |  |  |
| Never/ex-smokers pooled (n=2,050) | 1.31 (0.86−2.00) | 0.21 |
| Never-smokers (n=1,296) | 1.57 (0.92−2.69) | 0.10 |
| High eosinophil count defined as ≥0.45x109 cells/L | 1.15 (0.77−1.72)b | 0.50 |
| By known smoking status: |  |  |
| Never/ex-smokers pooled (n=2,050) | 1.49 (0.93−2.37) | 0.096 |
| Never-smokers (n=1,296) | 1.71 (0.97−3.03) | 0.063 |
| Excluding 115 patients initiated on ICS after the first hospitalization (n=2,498) |  |  |
| High eosinophil count defined as ≥0.35x109 cells/L (n=2,498) | 1.61 (1.12−2.32)a | 0.008 |
| By known smoking status: |  |  |
| Never/ex-smokers pooled (n=1,964) | 1.77 (1.15−2.72) | 0.009 |
| Excluding 284 patients with prior COPD diagnosis (n=2,329) |  |  |
| High eosinophil count defined as ≥0.35x109 cells/L (n=2,329) | 1.48 (1.01−2.17)a | 0.045 |
| By known smoking status: |  |  |
| Never/ex-smokers pooled (n=2,079) | 1.52 (1.02−2.27) | 0.040 |

HR = hazard ratio; ICS = inhaled corticosteroid.

aAdjusted for sex, age, smoking status, timing of blood eosinophil count measurement, duration of index hospitalization.

bAdjusted for sex, age, smoking status, body mass index, timing of blood eosinophil count measurement, duration of index hospitalization.
